# Supplementary material for: Built-in voltage enhanced by in situ electrochemical polymerized undoped conjugated hole-transporting modifiers in organic solar cells
Source: Royal Society of Chemistry journal article supplement (doi:10.1039/c9tc06140a), 2020-01-01
Supplement: c9tc06140a1.pdf [file c9tc06140a1.pdf]

# Supporting Information

## **Built-in voltage enhanced by in-situ electrochemical polymerized undoped conjugated hole-transporting modifier in organic solar cells**

Yanxun Li<sup>a, b, †</sup>, Xianglang Sun<sup>c, †</sup>, Xuning Zhang<sup>d</sup>, Dongyang Zhang<sup>d</sup>, Haoran Xia<sup>d</sup>,  
Jiyu Zhou<sup>d</sup>, Nafees Ahmad<sup>a, b</sup>, Xuanye Leng<sup>a, b</sup>, Shuo Yang<sup>a, b</sup>, Yuan Zhang<sup>d</sup>, Zhongan  
Li<sup>c, \*</sup>, Huiqiong Zhou<sup>a, \*</sup>

<sup>a</sup>. CAS Center for Excellence in Nanoscience, National Center for Nanoscience and  
Technology, Beijing 100190, P. R. China

<sup>b</sup>. University of Chinese Academy of Sciences, Beijing 100049, P. R. China

<sup>c</sup>. Huazhong University of Science and technology, Wuhan, 430074, P. R. China

<sup>d</sup>. School of Chemistry, Beihang University, No. 37 Xueyuan Road, Beijing 100191, P.  
R. China

<sup>†</sup> These authors have equally contributed to this work.

**Keywords:** Electropolymerized Film, Work Function, Recombination, Charge  
Extraction, Built-in Voltage

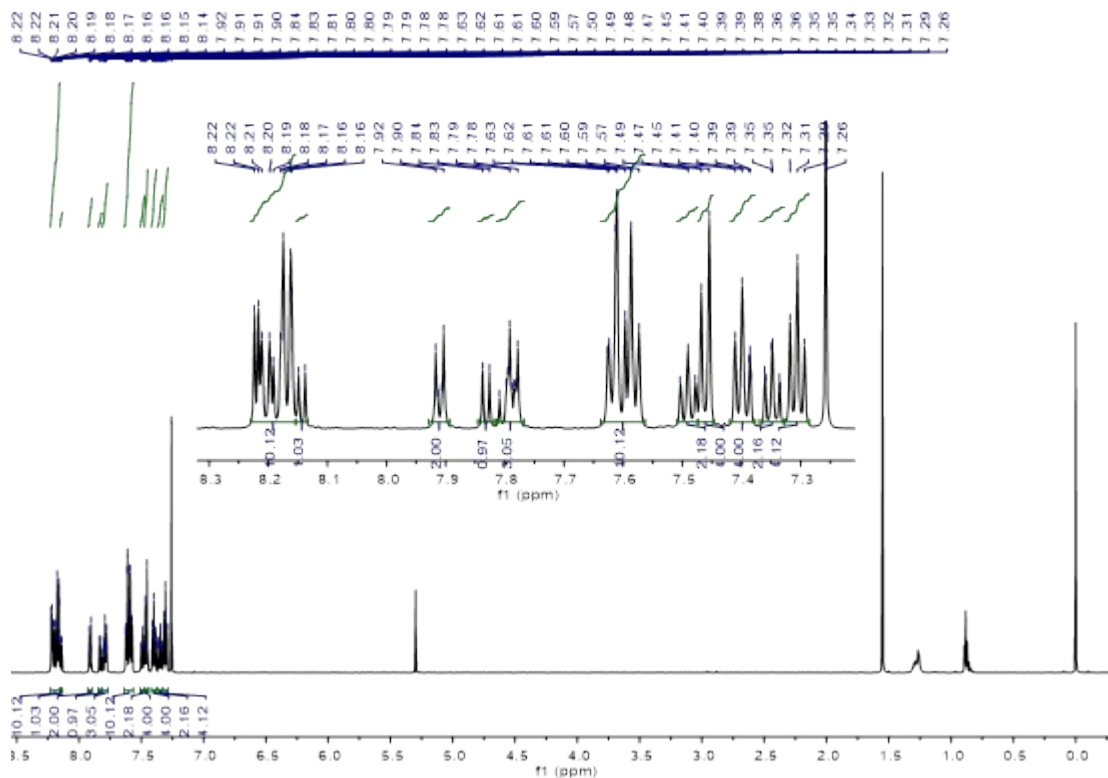

**Fig. S1.** The  $^1\text{H}$  NMR spectrum of TPCF, conducted in Chloroform-*d*.

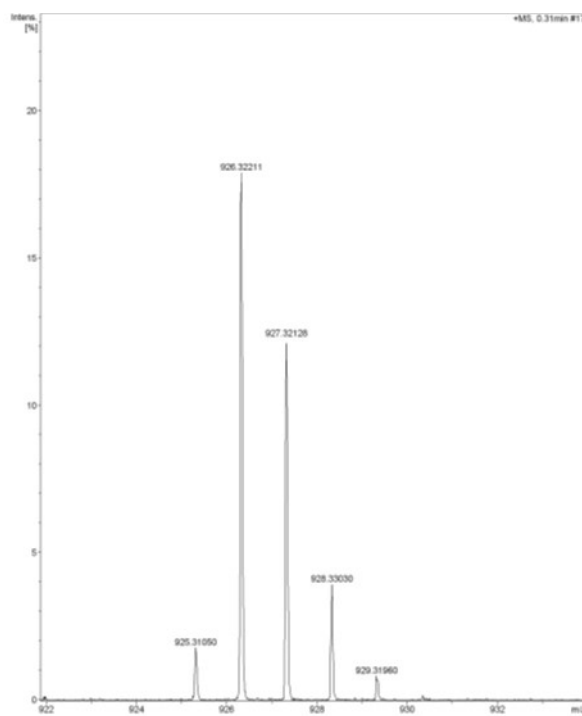

**Fig. S2.** The HR-MS spectrum of TPCF

$^1\text{H}$  NMR (600 MHz, Chloroform-*d*, which was exhibited in Figure S1)  $\delta$  8.24 – 8.15 (m, 10H, ArH), 8.14 (d,  $J = 6.7$  Hz, 1H, ArH), 7.93 – 7.89 (m, 2H, ArH), 7.83 (d,  $J = 7.0$  Hz, 1H, ArH), 7.81 – 7.77 (m, 3H, ArH), 7.64 – 7.56 (m, 10H, ArH), 7.49 (dd,  $J =$

8.2, 7.0 Hz, 2H, ArH), 7.46 (d,  $J = 8.1$  Hz, 4H, ArH), 7.42 – 7.38 (m, 4H, ArH), 7.37 – 7.33 (m, 2H, ArH), 7.31 (t,  $J = 7.4$  Hz, 4H, ArH).  $^{13}\text{C}$  NMR (101 MHz,  $\text{CDCl}_3$ , which was shown in Figure S2)  $\delta$  141.01, 140.85, 139.71, 139.51, 139.44, 139.27, 139.06, 138.75, 137.18, 136.80, 136.35, 136.20, 133.58, 133.44, 131.70, 131.58, 129.07, 128.60, 128.50, 126.98, 126.69, 126.07, 126.04, 125.90, 123.71, 123.66, 123.54, 123.44, 120.63, 120.51, 120.41, 120.35, 120.12, 120.00, 109.88, 109.67. HRMS (ESI):  $(\text{M}+\text{H})^+ = 926.3221$  (calcd for  $\text{C}_{70}\text{H}_{44}\text{N}_3^+$ , 926.3530).

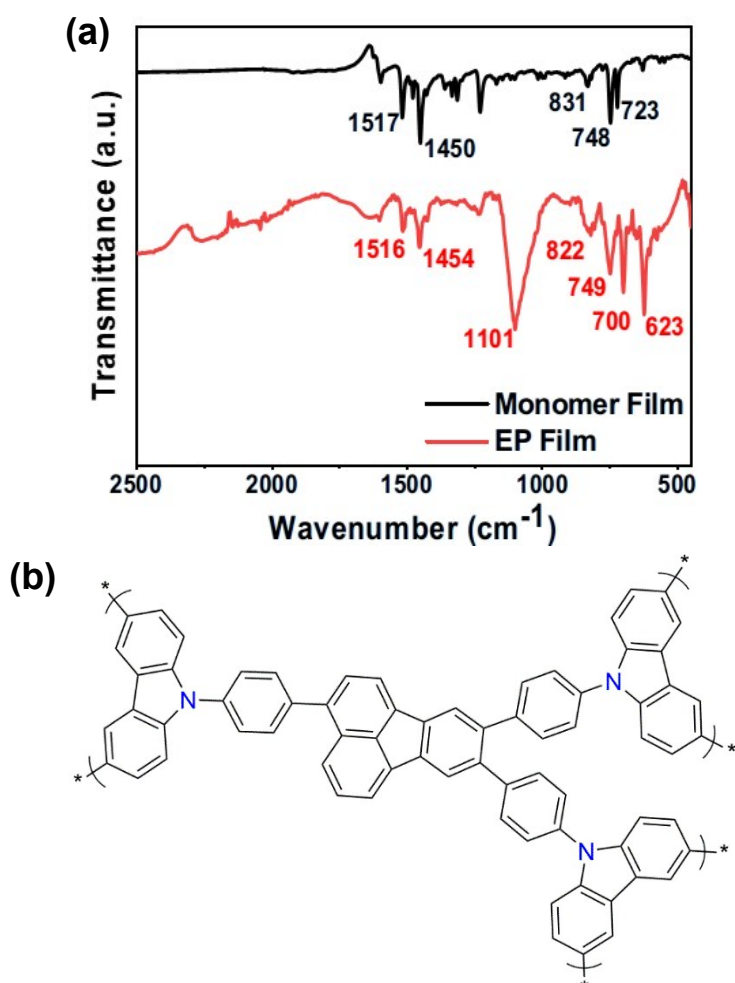

**Fig. S3.** a) Fourier transform infrared spectra of monomer film (the black one) and EP film (the red one). b) The chemical structure of p-TPCF.

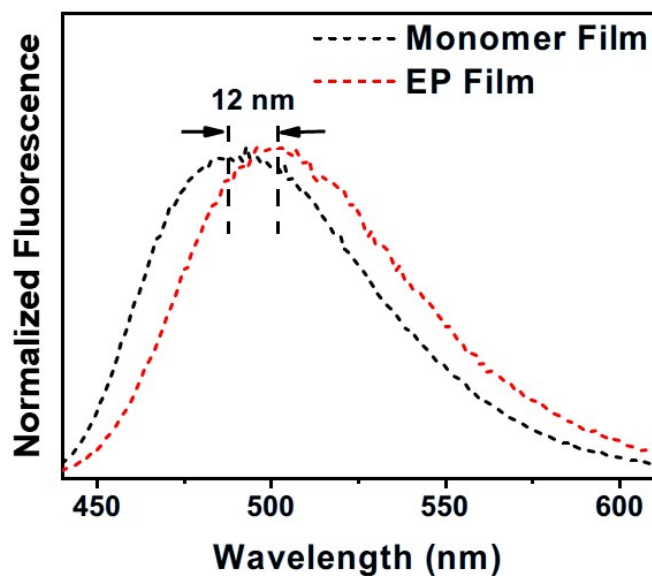

**Fig. S4.** Fluorescence spectrum of Electro-polymerization film (Red line) and monomer film (Black line).

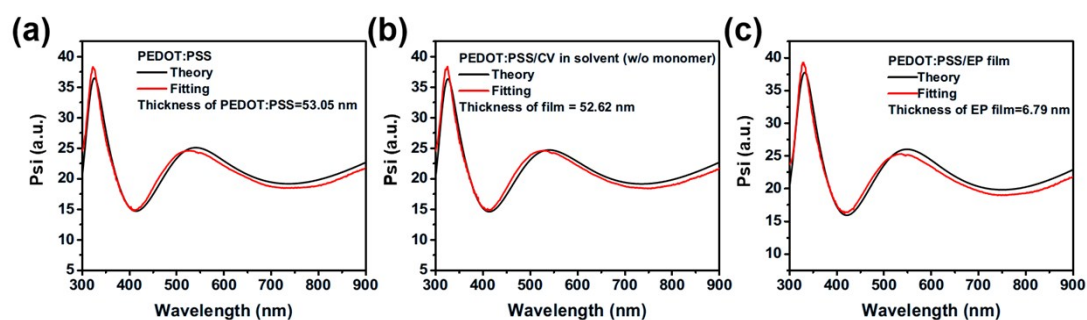

**Fig. S5.** Thickness data of a) PEDOT:PSS film, b) PEDOT:PSS film experienced CV process in solvent without monomer and c) PEDOT:PSS/EP film obtained by ellipsometer.

**Table S1.** The thickness parameters measured by ellipsometer.

| HTL                                      | Thickness (nm)            |
|------------------------------------------|---------------------------|
| PEDOT:PSS                                | 53.05                     |
| PEDOT:PSS/ CV (w/o EP film) <sup>a</sup> | 52.62                     |
| PEDOT:PSS/EP film                        | 53.05 / 6.79 <sup>b</sup> |

<sup>a</sup>. The PEDOT:PSS film treated by CV process in solvent ( $\text{CH}_3\text{CN}:\text{CH}_2\text{Cl}_2=1:4$ ) without monomer.

<sup>b</sup>. PEDOT:PSS thickness/EP film thickness.

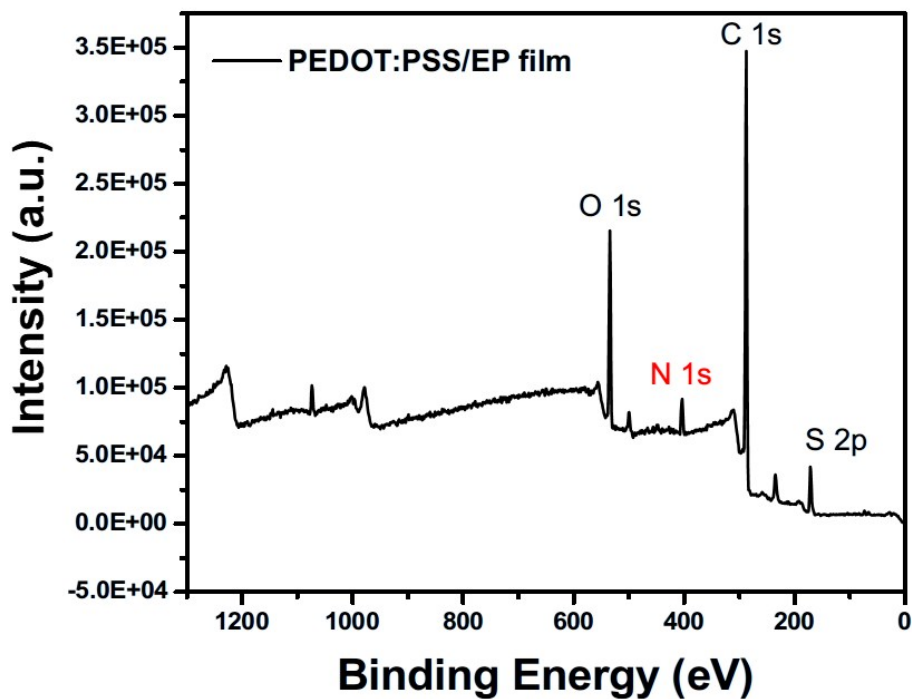

Fig. S6. XPS survey of PEDOT:PSS/EP film.

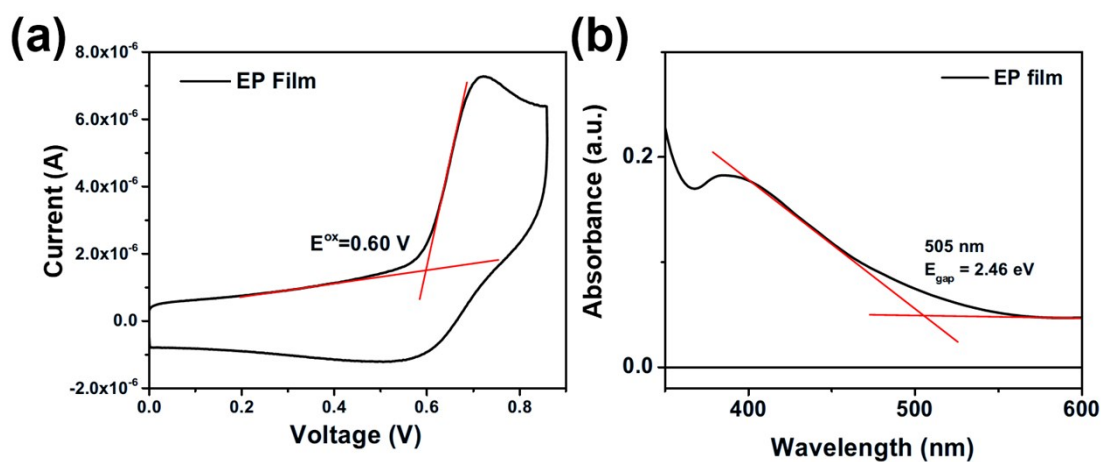

Fig. S7. a) CV test of p-TPCF EP film. In this test, ferrocene is applied as calibration.

b) UV-Vis absorbance spectra of EP-film.  $E_{\text{gap}} = 1240/\lambda$  ( $\lambda = 505 \text{ nm}$ )

Table S2. Parameters of p-TPCF including  $E_{\text{gap}}$ , HOMO and LUMO.

| Film   | $E_{\text{gap}}$ (eV) | HOMO (eV) | LUMO (eV) |
|--------|-----------------------|-----------|-----------|
| p-TPCF | 2.46                  | -5.3      | -2.84     |

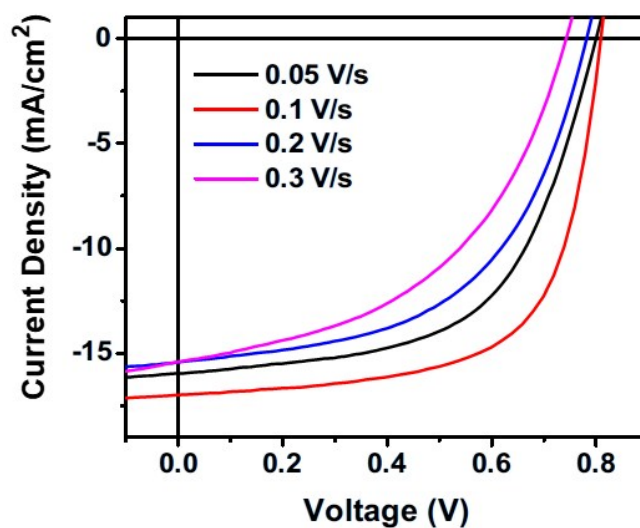

**Fig. S8.** J-V curves of devices with EP film polymerized on PEDOT:PSS in different scan rate.

**Table S3.** Parameters of EP film polymerized on PEDOT:PSS in different scan rate.

| Scan rate of CV<br>(V/s) | $V_{oc}$<br>(V) | $J_{sc}$<br>(mA/cm <sup>2</sup> ) | FF<br>(%) | PCE<br>(%) |
|--------------------------|-----------------|-----------------------------------|-----------|------------|
| 0.05                     | 0.80            | 15.96                             | 57.97     | 7.40       |
| 0.10                     | 0.80            | 16.98                             | 66.21     | 8.99       |
| 0.20                     | 0.78            | 15.40                             | 53.99     | 6.48       |
| 0.30                     | 0.74            | 15.42                             | 47.96     | 5.47       |

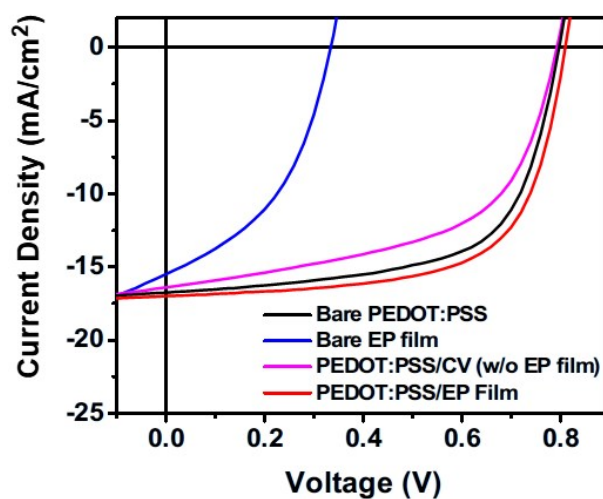

Fig. S9. J-V characteristics of devices with bare PEDOT:PSS (black), PEDOT:PSS/CV (w/o EP film) (pink), bare EP film (blue) and PEDOT:PSS/EP film (red).

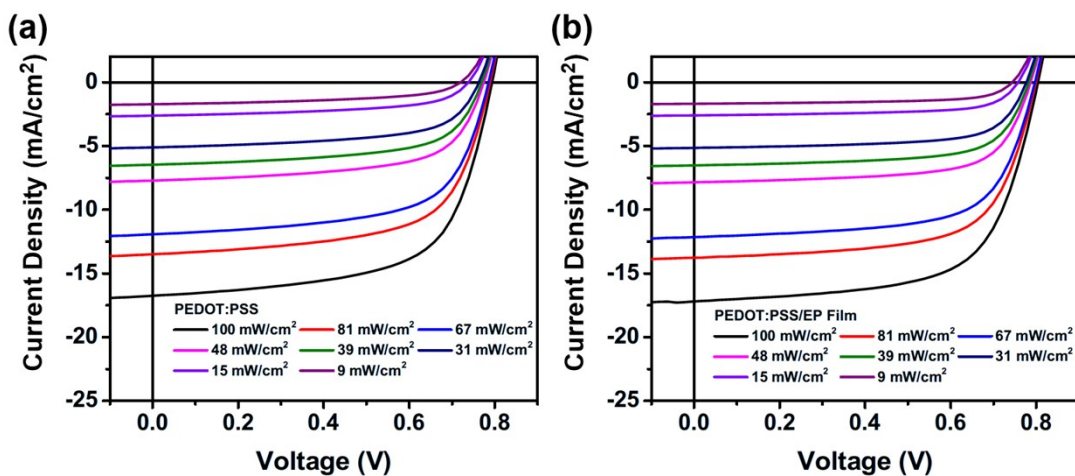

Fig. S10. J-V characteristics at different light intensities of organic solar cells a) without EP-film modified and b) with EP-film modified.

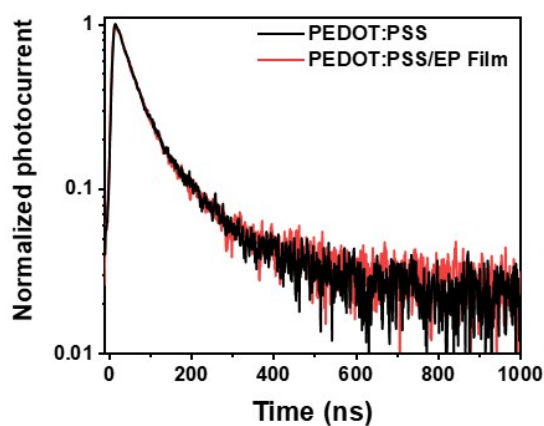

Fig. S11. Transient photocurrent characterization of devices with various HTLs.
