# Supplementary figures and images for: Built-in voltage enhanced by in situ electrochemical polymerized undoped conjugated hole-transporting modifiers in organic solar cells
Source: Royal Society of Chemistry journal article supplement (doi:10.1039/c9tc06140a), 2020-01-01

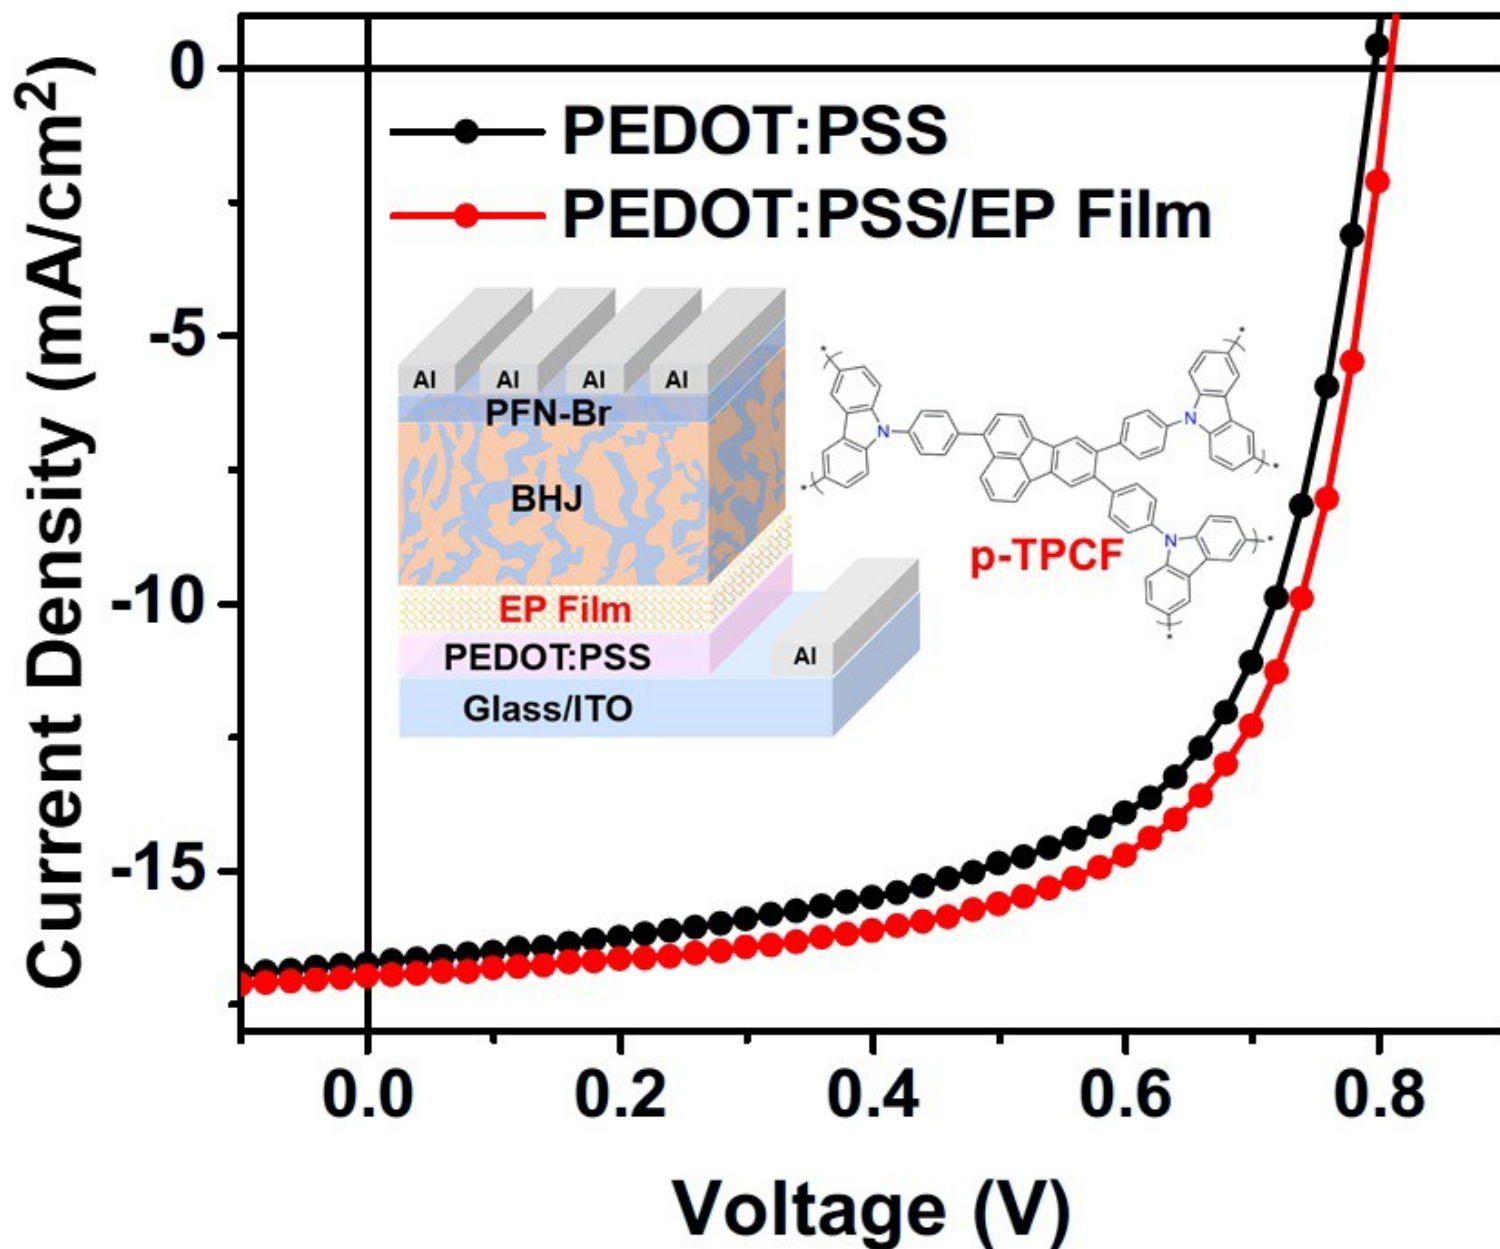

Supplement: c9tc06140a2.pdf [file c9tc06140a2.pdf]
